# Supplementary material for: Data Traffic Offload from Mobile to Wi‐Fi Networks: Behavioural Patterns of Smartphone Users
Source: Hindawi journal article supplement (doi:10.1155/2018/2608419), 2018-01-01
Supplement: f1 [file 2608419.f1.pdf]

# Annex 1: Behavioural patterns and corresponding variation in the probability of belonging to each category of data traffic offloading

| ID      | Levels of independent variables |      |       |       |       |       | Probability of belonging to a certain category of dependent variable |        |        |        |       |
|---------|---------------------------------|------|-------|-------|-------|-------|----------------------------------------------------------------------|--------|--------|--------|-------|
|         | $x3$                            | $x9$ | $x10$ | $x13$ | $x16$ | $x17$ | 0                                                                    | 1      | 2      | 3      | 4     |
| 1071194 | 1                               | 1    | 2     | 0     | 1     | 0     | 75,82%                                                               | 20,42% | 2,75%  | 0,87%  | 0,13% |
| 1037942 | 1                               | 2    | 2     | 0     | 1     | 0     | 72,02%                                                               | 23,44% | 3,32%  | 1,06%  | 0,15% |
| 1074764 | 0                               | 0    | 2     | 0     | 1     | 0     | 69,93%                                                               | 25,07% | 3,65%  | 1,17%  | 0,17% |
| 1047938 | 0                               | 0    | 2     | 0     | 1     | 0     | 69,93%                                                               | 25,07% | 3,65%  | 1,17%  | 0,17% |
| 1080884 | 1                               | 1    | 2     | 0     | 1     | 1     | 69,25%                                                               | 25,60% | 3,76%  | 1,21%  | 0,18% |
| 1052018 | 1                               | 1    | 2     | 0     | 1     | 1     | 69,25%                                                               | 25,60% | 3,76%  | 1,21%  | 0,18% |
| 1044980 | 1                               | 3    | 2     | 0     | 1     | 1     | 60,28%                                                               | 32,26% | 5,41%  | 1,79%  | 0,26% |
| 1055282 | 0                               | 1    | 2     | 0     | 1     | 1     | 57,82%                                                               | 33,99% | 5,93%  | 1,97%  | 0,29% |
| 1056608 | 1                               | 1    | 2     | 0     | 0     | 1     | 48,59%                                                               | 39,95% | 8,22%  | 2,83%  | 0,42% |
| 1067012 | 1                               | 3    | 0     | 0     | 1     | 0     | 46,99%                                                               | 40,89% | 8,68%  | 3,01%  | 0,44% |
| 1060280 | 0                               | 3    | 1     | 0     | 1     | 0     | 45,44%                                                               | 41,75% | 9,14%  | 3,19%  | 0,47% |
| 1085474 | 0                               | 1    | 0     | 0     | 1     | 0     | 44,47%                                                               | 42,28% | 9,44%  | 3,31%  | 0,49% |
| 1082312 | 0                               | 1    | 2     | 0     | 0     | 1     | 36,52%                                                               | 45,95% | 12,31% | 4,54%  | 0,68% |
| 1055384 | 1                               | 2    | 2     | 1     | 2     | 0     | 36,22%                                                               | 46,06% | 12,44% | 4,59%  | 0,69% |
| 1048448 | 1                               | 0    | 1     | 0     | 0     | 2     | 34,87%                                                               | 46,53% | 13,01% | 4,85%  | 0,73% |
| 1088534 | 0                               | 2    | 2     | 0     | 0     | 1     | 32,07%                                                               | 47,35% | 14,29% | 5,46%  | 0,83% |
| 1087208 | 0                               | 0    | 1     | 0     | 0     | 1     | 31,22%                                                               | 47,55% | 14,70% | 5,66%  | 0,86% |
| 1001426 | 1                               | 3    | 1     | 0     | 0     | 1     | 29,20%                                                               | 47,93% | 15,74% | 6,18%  | 0,95% |
| 1087310 | 0                               | 3    | 0     | 0     | 1     | 1     | 27,92%                                                               | 48,08% | 16,44% | 6,55%  | 1,01% |
| 1084964 | 0                               | 0    | 2     | 1     | 2     | 1     | 26,93%                                                               | 48,15% | 17,00% | 6,86%  | 1,06% |
| 1001120 | 1                               | 0    | 2     | 1     | 1     | 0     | 26,13%                                                               | 48,18% | 17,47% | 7,11%  | 1,11% |
| 1055690 | 1                               | 0    | 2     | 1     | 1     | 0     | 26,13%                                                               | 48,18% | 17,47% | 7,11%  | 1,11% |
| 1050386 | 1                               | 0    | 0     | 0     | 0     | 2     | 25,75%                                                               | 48,18% | 17,70% | 7,24%  | 1,13% |
| 1075070 | 1                               | 2    | 0     | 0     | 0     | 1     | 24,55%                                                               | 48,13% | 18,45% | 7,67%  | 1,20% |
| 1060178 | 0                               | 0    | 0     | 0     | 0     | 1     | 22,72%                                                               | 47,90% | 19,65% | 8,40%  | 1,33% |
| 1001630 | 1                               | 1    | 2     | 1     | 1     | 0     | 22,50%                                                               | 47,86% | 19,80% | 8,49%  | 1,35% |
| 1063646 | 1                               | 1    | 2     | 1     | 1     | 0     | 22,50%                                                               | 47,86% | 19,80% | 8,49%  | 1,35% |
| 1061300 | 1                               | 1    | 2     | 1     | 1     | 0     | 22,50%                                                               | 47,86% | 19,80% | 8,49%  | 1,35% |
| 1078844 | 1                               | 1    | 2     | 1     | 1     | 0     | 22,50%                                                               | 47,86% | 19,80% | 8,49%  | 1,35% |
| 1078436 | 1                               | 1    | 2     | 1     | 1     | 0     | 22,50%                                                               | 47,86% | 19,80% | 8,49%  | 1,35% |
| 1076804 | 1                               | 3    | 0     | 0     | 0     | 1     | 21,08%                                                               | 47,51% | 20,81% | 9,15%  | 1,46% |
| 1089656 | 1                               | 0    | 2     | 1     | 1     | 1     | 20,26%                                                               | 47,24% | 21,41% | 9,56%  | 1,53% |
| 1088330 | 0                               | 3    | 1     | 0     | 0     | 1     | 20,06%                                                               | 47,17% | 21,56% | 9,66%  | 1,55% |
| 1045592 | 1                               | 2    | 2     | 1     | 1     | 0     | 19,24%                                                               | 46,84% | 22,18% | 10,10% | 1,63% |
| 1079762 | 1                               | 2    | 2     | 1     | 1     | 0     | 19,24%                                                               | 46,84% | 22,18% | 10,10% | 1,63% |
| 1077008 | 0                               | 0    | 2     | 1     | 1     | 0     | 17,72%                                                               | 46,06% | 23,40% | 11,02% | 1,81% |
| 1073540 | 0                               | 0    | 2     | 1     | 1     | 0     | 17,72%                                                               | 46,06% | 23,40% | 11,02% | 1,81% |

|         |   |   |   |   |   |   |        |        |        |        |       |
|---------|---|---|---|---|---|---|--------|--------|--------|--------|-------|
| 1082618 | 0 | 0 | 2 | 1 | 1 | 0 | 17,72% | 46,06% | 23,40% | 11,02% | 1,81% |
| 1048142 | 0 | 0 | 2 | 1 | 1 | 0 | 17,72% | 46,06% | 23,40% | 11,02% | 1,81% |
| 1080170 | 1 | 1 | 2 | 1 | 1 | 1 | 17,25% | 45,77% | 23,78% | 11,33% | 1,86% |
| 1059872 | 1 | 3 | 2 | 1 | 1 | 0 | 16,36% | 45,17% | 24,53% | 11,96% | 1,98% |
| 1074968 | 0 | 1 | 2 | 1 | 1 | 0 | 15,02% | 44,08% | 25,70% | 13,01% | 2,19% |
| 1037738 | 0 | 1 | 2 | 1 | 1 | 0 | 15,02% | 44,08% | 25,70% | 13,01% | 2,19% |
| 1079252 | 0 | 1 | 2 | 1 | 1 | 0 | 15,02% | 44,08% | 25,70% | 13,01% | 2,19% |
| 1055792 | 1 | 2 | 2 | 1 | 1 | 1 | 14,61% | 43,71% | 26,06% | 13,36% | 2,26% |
| 1062626 | 1 | 0 | 1 | 1 | 1 | 1 | 14,13% | 43,23% | 26,49% | 13,80% | 2,35% |
| 1079150 | 1 | 0 | 2 | 1 | 0 | 0 | 12,92% | 41,90% | 27,59% | 14,99% | 2,60% |
| 1062830 | 1 | 0 | 2 | 1 | 0 | 0 | 12,92% | 41,90% | 27,59% | 14,99% | 2,60% |
| 1003466 | 1 | 0 | 2 | 1 | 0 | 0 | 12,92% | 41,90% | 27,59% | 14,99% | 2,60% |
| 1077110 | 1 | 0 | 2 | 1 | 0 | 0 | 12,92% | 41,90% | 27,59% | 14,99% | 2,60% |
| 1063748 | 1 | 0 | 2 | 1 | 0 | 0 | 12,92% | 41,90% | 27,59% | 14,99% | 2,60% |
| 1059566 | 1 | 0 | 2 | 1 | 0 | 0 | 12,92% | 41,90% | 27,59% | 14,99% | 2,60% |
| 1064156 | 0 | 2 | 2 | 1 | 1 | 0 | 12,67% | 41,59% | 27,82% | 15,27% | 2,66% |
| 1062320 | 0 | 2 | 2 | 1 | 1 | 0 | 12,67% | 41,59% | 27,82% | 15,27% | 2,66% |
| 1042736 | 0 | 2 | 2 | 1 | 1 | 0 | 12,67% | 41,59% | 27,82% | 15,27% | 2,66% |
| 1051100 | 1 | 3 | 2 | 1 | 1 | 1 | 12,32% | 41,14% | 28,14% | 15,66% | 2,74% |
| 1062524 | 1 | 1 | 1 | 1 | 1 | 1 | 11,90% | 40,57% | 28,52% | 16,16% | 2,85% |
| 1004282 | 1 | 1 | 1 | 1 | 1 | 1 | 11,90% | 40,57% | 28,52% | 16,16% | 2,85% |
| 1087004 | 0 | 4 | 0 | 0 | 0 | 1 | 11,77% | 40,40% | 28,64% | 16,31% | 2,88% |
| 1002752 | 0 | 1 | 2 | 1 | 1 | 1 | 11,26% | 39,66% | 29,10% | 16,95% | 3,03% |
| 1049366 | 0 | 1 | 2 | 1 | 1 | 1 | 11,26% | 39,66% | 29,10% | 16,95% | 3,03% |
| 1078640 | 0 | 1 | 2 | 1 | 1 | 1 | 11,26% | 39,66% | 29,10% | 16,95% | 3,03% |
| 1002854 | 1 | 1 | 2 | 1 | 0 | 0 | 10,86% | 39,04% | 29,46% | 17,49% | 3,15% |
| 1088432 | 1 | 1 | 2 | 1 | 0 | 0 | 10,86% | 39,04% | 29,46% | 17,49% | 3,15% |
| 1043756 | 1 | 1 | 2 | 1 | 0 | 0 | 10,86% | 39,04% | 29,46% | 17,49% | 3,15% |
| 1055078 | 1 | 1 | 2 | 1 | 0 | 0 | 10,86% | 39,04% | 29,46% | 17,49% | 3,15% |
| 1085780 | 1 | 1 | 2 | 1 | 0 | 0 | 10,86% | 39,04% | 29,46% | 17,49% | 3,15% |
| 1061504 | 1 | 1 | 2 | 1 | 0 | 0 | 10,86% | 39,04% | 29,46% | 17,49% | 3,15% |
| 1044572 | 1 | 1 | 2 | 1 | 0 | 0 | 10,86% | 39,04% | 29,46% | 17,49% | 3,15% |
| 1055894 | 0 | 3 | 2 | 1 | 1 | 0 | 10,64% | 38,69% | 29,65% | 17,80% | 3,22% |
| 1052936 | 0 | 1 | 1 | 1 | 1 | 0 | 10,27% | 38,07% | 29,98% | 18,34% | 3,34% |
| 1030394 | 0 | 1 | 1 | 1 | 1 | 0 | 10,27% | 38,07% | 29,98% | 18,34% | 3,34% |
| 1056404 | 0 | 0 | 2 | 1 | 1 | 2 | 9,99%  | 37,59% | 30,21% | 18,76% | 3,44% |
| 1042430 | 0 | 0 | 2 | 1 | 1 | 2 | 9,99%  | 37,59% | 30,21% | 18,76% | 3,44% |
| 1001732 | 1 | 0 | 2 | 1 | 0 | 1 | 9,63%  | 36,93% | 30,52% | 19,33% | 3,58% |
| 1004588 | 1 | 0 | 2 | 1 | 0 | 1 | 9,63%  | 36,93% | 30,52% | 19,33% | 3,58% |
| 1042532 | 1 | 0 | 2 | 1 | 0 | 1 | 9,63%  | 36,93% | 30,52% | 19,33% | 3,58% |
| 1074662 | 1 | 0 | 2 | 1 | 0 | 1 | 9,63%  | 36,93% | 30,52% | 19,33% | 3,58% |
| 1073642 | 1 | 0 | 2 | 1 | 0 | 1 | 9,63%  | 36,93% | 30,52% | 19,33% | 3,58% |
| 1085678 | 1 | 0 | 2 | 1 | 0 | 1 | 9,63%  | 36,93% | 30,52% | 19,33% | 3,58% |

|         |   |   |   |   |   |   |       |        |        |        |       |
|---------|---|---|---|---|---|---|-------|--------|--------|--------|-------|
| 1084760 | 1 | 0 | 2 | 1 | 0 | 1 | 9,63% | 36,93% | 30,52% | 19,33% | 3,58% |
| 1067522 | 1 | 0 | 2 | 1 | 0 | 1 | 9,63% | 36,93% | 30,52% | 19,33% | 3,58% |
| 1040492 | 1 | 0 | 2 | 1 | 0 | 1 | 9,63% | 36,93% | 30,52% | 19,33% | 3,58% |
| 1056710 | 1 | 0 | 2 | 1 | 0 | 1 | 9,63% | 36,93% | 30,52% | 19,33% | 3,58% |
| 1044776 | 0 | 2 | 2 | 1 | 1 | 1 | 9,43% | 36,56% | 30,68% | 19,66% | 3,66% |
| 1059770 | 0 | 0 | 1 | 1 | 1 | 1 | 9,10% | 35,91% | 30,95% | 20,23% | 3,80% |
| 1072214 | 1 | 2 | 2 | 1 | 0 | 0 | 9,09% | 35,89% | 30,96% | 20,25% | 3,81% |
| 1002446 | 1 | 2 | 2 | 1 | 0 | 0 | 9,09% | 35,89% | 30,96% | 20,25% | 3,81% |
| 1066808 | 1 | 2 | 2 | 1 | 0 | 0 | 9,09% | 35,89% | 30,96% | 20,25% | 3,81% |
| 1042634 | 1 | 2 | 2 | 1 | 0 | 0 | 9,09% | 35,89% | 30,96% | 20,25% | 3,81% |
| 1079864 | 1 | 2 | 2 | 1 | 0 | 0 | 9,09% | 35,89% | 30,96% | 20,25% | 3,81% |
| 1072724 | 1 | 2 | 2 | 1 | 0 | 0 | 9,09% | 35,89% | 30,96% | 20,25% | 3,81% |
| 1000610 | 1 | 2 | 0 | 1 | 1 | 0 | 9,09% | 35,88% | 30,96% | 20,26% | 3,81% |
| 1003058 | 1 | 0 | 1 | 1 | 0 | 0 | 8,77% | 35,24% | 31,20% | 20,84% | 3,96% |
| 1063136 | 1 | 0 | 1 | 1 | 0 | 0 | 8,77% | 35,24% | 31,20% | 20,84% | 3,96% |
| 1086800 | 1 | 3 | 1 | 1 | 1 | 1 | 8,34% | 34,31% | 31,51% | 21,66% | 4,17% |
| 1086086 | 1 | 3 | 1 | 1 | 1 | 1 | 8,34% | 34,31% | 31,51% | 21,66% | 4,17% |
| 1073336 | 1 | 3 | 1 | 1 | 1 | 1 | 8,34% | 34,31% | 31,51% | 21,66% | 4,17% |
| 1043348 | 0 | 0 | 2 | 1 | 0 | 0 | 8,29% | 34,20% | 31,55% | 21,77% | 4,20% |
| 1089758 | 0 | 0 | 2 | 1 | 0 | 0 | 8,29% | 34,20% | 31,55% | 21,77% | 4,20% |
| 1072622 | 0 | 0 | 2 | 1 | 0 | 0 | 8,29% | 34,20% | 31,55% | 21,77% | 4,20% |
| 1001018 | 0 | 0 | 2 | 1 | 0 | 0 | 8,29% | 34,20% | 31,55% | 21,77% | 4,20% |
| 1061912 | 0 | 0 | 2 | 1 | 0 | 0 | 8,29% | 34,20% | 31,55% | 21,77% | 4,20% |
| 1037636 | 0 | 0 | 2 | 1 | 0 | 0 | 8,29% | 34,20% | 31,55% | 21,77% | 4,20% |
| 1039676 | 0 | 0 | 2 | 1 | 0 | 0 | 8,29% | 34,20% | 31,55% | 21,77% | 4,20% |
| 1051916 | 0 | 0 | 2 | 1 | 0 | 0 | 8,29% | 34,20% | 31,55% | 21,77% | 4,20% |
| 1067624 | 0 | 0 | 2 | 1 | 0 | 0 | 8,29% | 34,20% | 31,55% | 21,77% | 4,20% |
| 1060790 | 1 | 1 | 2 | 1 | 0 | 1 | 8,04% | 33,66% | 31,71% | 22,26% | 4,33% |
| 1062422 | 1 | 1 | 2 | 1 | 0 | 1 | 8,04% | 33,66% | 31,71% | 22,26% | 4,33% |
| 1002242 | 1 | 1 | 2 | 1 | 0 | 1 | 8,04% | 33,66% | 31,71% | 22,26% | 4,33% |
| 1056200 | 1 | 1 | 2 | 1 | 0 | 1 | 8,04% | 33,66% | 31,71% | 22,26% | 4,33% |
| 1063952 | 1 | 1 | 2 | 1 | 0 | 1 | 8,04% | 33,66% | 31,71% | 22,26% | 4,33% |
| 1082414 | 1 | 1 | 2 | 1 | 0 | 1 | 8,04% | 33,66% | 31,71% | 22,26% | 4,33% |
| 1001528 | 1 | 1 | 2 | 1 | 0 | 1 | 8,04% | 33,66% | 31,71% | 22,26% | 4,33% |
| 1089554 | 1 | 1 | 2 | 1 | 0 | 1 | 8,04% | 33,66% | 31,71% | 22,26% | 4,33% |
| 1078946 | 0 | 1 | 1 | 1 | 1 | 1 | 7,60% | 32,60% | 31,98% | 23,23% | 4,60% |
| 1045490 | 0 | 1 | 1 | 1 | 1 | 1 | 7,60% | 32,60% | 31,98% | 23,23% | 4,60% |
| 1045796 | 0 | 1 | 1 | 1 | 1 | 1 | 7,60% | 32,60% | 31,98% | 23,23% | 4,60% |
| 1056302 | 1 | 3 | 2 | 1 | 0 | 0 | 7,58% | 32,57% | 31,99% | 23,25% | 4,60% |
| 1086698 | 1 | 3 | 2 | 1 | 0 | 0 | 7,58% | 32,57% | 31,99% | 23,25% | 4,60% |
| 1002344 | 1 | 3 | 2 | 1 | 0 | 0 | 7,58% | 32,57% | 31,99% | 23,25% | 4,60% |
| 1089860 | 1 | 3 | 2 | 1 | 0 | 0 | 7,58% | 32,57% | 31,99% | 23,25% | 4,60% |
| 1082822 | 1 | 3 | 2 | 1 | 0 | 0 | 7,58% | 32,57% | 31,99% | 23,25% | 4,60% |

|         |   |   |   |   |   |   |       |        |        |        |       |
|---------|---|---|---|---|---|---|-------|--------|--------|--------|-------|
| 1076192 | 0 | 3 | 1 | 1 | 1 | 0 | 7,16% | 31,51% | 32,21% | 24,24% | 4,88% |
| 1004690 | 1 | 0 | 2 | 1 | 0 | 2 | 7,11% | 31,38% | 32,23% | 24,36% | 4,92% |
| 1003670 | 1 | 0 | 2 | 1 | 0 | 2 | 7,11% | 31,38% | 32,23% | 24,36% | 4,92% |
| 1002956 | 1 | 0 | 2 | 1 | 0 | 2 | 7,11% | 31,38% | 32,23% | 24,36% | 4,92% |
| 1030802 | 1 | 0 | 2 | 1 | 0 | 2 | 7,11% | 31,38% | 32,23% | 24,36% | 4,92% |
| 1081904 | 1 | 0 | 2 | 1 | 0 | 2 | 7,11% | 31,38% | 32,23% | 24,36% | 4,92% |
| 1039064 | 1 | 0 | 2 | 1 | 0 | 2 | 7,11% | 31,38% | 32,23% | 24,36% | 4,92% |
| 1055588 | 1 | 0 | 2 | 1 | 0 | 2 | 7,11% | 31,38% | 32,23% | 24,36% | 4,92% |
| 1060382 | 1 | 0 | 2 | 1 | 0 | 2 | 7,11% | 31,38% | 32,23% | 24,36% | 4,92% |
| 1086290 | 0 | 2 | 2 | 1 | 1 | 2 | 6,96% | 30,99% | 32,30% | 24,73% | 5,03% |
| 1088228 | 0 | 2 | 2 | 1 | 1 | 2 | 6,96% | 30,99% | 32,30% | 24,73% | 5,03% |
| 1038044 | 1 | 4 | 1 | 1 | 1 | 1 | 6,95% | 30,96% | 32,30% | 24,76% | 5,04% |
| 1074152 | 0 | 1 | 2 | 1 | 0 | 0 | 6,90% | 30,84% | 32,32% | 24,87% | 5,07% |
| 1079660 | 0 | 1 | 2 | 1 | 0 | 0 | 6,90% | 30,84% | 32,32% | 24,87% | 5,07% |
| 1070582 | 0 | 1 | 2 | 1 | 0 | 0 | 6,90% | 30,84% | 32,32% | 24,87% | 5,07% |
| 1056506 | 0 | 1 | 2 | 1 | 0 | 0 | 6,90% | 30,84% | 32,32% | 24,87% | 5,07% |
| 1030190 | 0 | 1 | 2 | 1 | 0 | 0 | 6,90% | 30,84% | 32,32% | 24,87% | 5,07% |
| 1002140 | 0 | 1 | 2 | 1 | 0 | 0 | 6,90% | 30,84% | 32,32% | 24,87% | 5,07% |
| 1088126 | 0 | 1 | 2 | 1 | 0 | 0 | 6,90% | 30,84% | 32,32% | 24,87% | 5,07% |
| 1081802 | 0 | 1 | 2 | 1 | 0 | 0 | 6,90% | 30,84% | 32,32% | 24,87% | 5,07% |
| 1071908 | 0 | 1 | 2 | 1 | 0 | 0 | 6,90% | 30,84% | 32,32% | 24,87% | 5,07% |
| 1080476 | 0 | 1 | 2 | 1 | 0 | 0 | 6,90% | 30,84% | 32,32% | 24,87% | 5,07% |
| 1029782 | 1 | 2 | 2 | 1 | 0 | 1 | 6,70% | 30,29% | 32,39% | 25,39% | 5,23% |
| 1071398 | 1 | 2 | 2 | 1 | 0 | 1 | 6,70% | 30,29% | 32,39% | 25,39% | 5,23% |
| 1077212 | 1 | 2 | 2 | 1 | 0 | 1 | 6,70% | 30,29% | 32,39% | 25,39% | 5,23% |
| 1005098 | 1 | 2 | 2 | 1 | 0 | 1 | 6,70% | 30,29% | 32,39% | 25,39% | 5,23% |
| 1030700 | 1 | 0 | 1 | 1 | 0 | 1 | 6,46% | 29,62% | 32,46% | 26,04% | 5,42% |
| 1057424 | 1 | 0 | 1 | 1 | 0 | 1 | 6,46% | 29,62% | 32,46% | 26,04% | 5,42% |
| 1064360 | 0 | 0 | 2 | 1 | 0 | 1 | 6,09% | 28,57% | 32,53% | 27,06% | 5,75% |
| 1067726 | 0 | 0 | 2 | 1 | 0 | 1 | 6,09% | 28,57% | 32,53% | 27,06% | 5,75% |
| 1074356 | 0 | 0 | 2 | 1 | 0 | 1 | 6,09% | 28,57% | 32,53% | 27,06% | 5,75% |
| 1071806 | 0 | 0 | 2 | 1 | 0 | 1 | 6,09% | 28,57% | 32,53% | 27,06% | 5,75% |
| 1063034 | 0 | 0 | 2 | 1 | 0 | 1 | 6,09% | 28,57% | 32,53% | 27,06% | 5,75% |
| 1082006 | 0 | 0 | 2 | 1 | 0 | 1 | 6,09% | 28,57% | 32,53% | 27,06% | 5,75% |
| 1059974 | 0 | 0 | 2 | 1 | 0 | 1 | 6,09% | 28,57% | 32,53% | 27,06% | 5,75% |
| 1086902 | 0 | 0 | 2 | 1 | 0 | 1 | 6,09% | 28,57% | 32,53% | 27,06% | 5,75% |
| 1049570 | 0 | 0 | 2 | 1 | 0 | 1 | 6,09% | 28,57% | 32,53% | 27,06% | 5,75% |
| 1057016 | 0 | 0 | 2 | 1 | 0 | 1 | 6,09% | 28,57% | 32,53% | 27,06% | 5,75% |
| 1043858 | 0 | 0 | 2 | 1 | 0 | 1 | 6,09% | 28,57% | 32,53% | 27,06% | 5,75% |
| 1039574 | 0 | 0 | 2 | 1 | 0 | 1 | 6,09% | 28,57% | 32,53% | 27,06% | 5,75% |
| 1057220 | 0 | 0 | 2 | 1 | 0 | 1 | 6,09% | 28,57% | 32,53% | 27,06% | 5,75% |
| 1082516 | 0 | 0 | 2 | 1 | 0 | 1 | 6,09% | 28,57% | 32,53% | 27,06% | 5,75% |
| 1044878 | 1 | 1 | 2 | 1 | 0 | 2 | 5,91% | 28,02% | 32,54% | 27,60% | 5,93% |

|         |   |   |   |   |   |   |       |        |        |        |       |
|---------|---|---|---|---|---|---|-------|--------|--------|--------|-------|
| 1057628 | 1 | 0 | 0 | 1 | 0 | 0 | 5,86% | 27,87% | 32,54% | 27,75% | 5,98% |
| 1073234 | 1 | 0 | 0 | 1 | 0 | 0 | 5,86% | 27,87% | 32,54% | 27,75% | 5,98% |
| 1030496 | 0 | 3 | 0 | 1 | 2 | 2 | 5,78% | 27,63% | 32,54% | 27,99% | 6,06% |
| 1003364 | 0 | 2 | 2 | 1 | 0 | 0 | 5,74% | 27,49% | 32,54% | 28,13% | 6,11% |
| 1071296 | 0 | 2 | 2 | 1 | 0 | 0 | 5,74% | 27,49% | 32,54% | 28,13% | 6,11% |
| 1045286 | 0 | 2 | 2 | 1 | 0 | 0 | 5,74% | 27,49% | 32,54% | 28,13% | 6,11% |
| 1074866 | 1 | 3 | 2 | 1 | 0 | 1 | 5,57% | 26,95% | 32,52% | 28,67% | 6,29% |
| 1070480 | 1 | 3 | 2 | 1 | 0 | 1 | 5,57% | 26,95% | 32,52% | 28,67% | 6,29% |
| 1003772 | 0 | 0 | 1 | 1 | 0 | 0 | 5,53% | 26,83% | 32,51% | 28,79% | 6,34% |
| 1061096 | 0 | 0 | 1 | 1 | 0 | 0 | 5,53% | 26,83% | 32,51% | 28,79% | 6,34% |
| 1044164 | 0 | 0 | 1 | 1 | 0 | 0 | 5,53% | 26,83% | 32,51% | 28,79% | 6,34% |
| 1060586 | 1 | 1 | 1 | 1 | 0 | 1 | 5,36% | 26,30% | 32,48% | 29,33% | 6,53% |
| 1063442 | 1 | 1 | 1 | 1 | 0 | 1 | 5,36% | 26,30% | 32,48% | 29,33% | 6,53% |
| 1083230 | 1 | 1 | 1 | 1 | 0 | 1 | 5,36% | 26,30% | 32,48% | 29,33% | 6,53% |
| 1080680 | 0 | 1 | 2 | 1 | 0 | 1 | 5,06% | 25,28% | 32,36% | 30,38% | 6,92% |
| 1083128 | 0 | 1 | 2 | 1 | 0 | 1 | 5,06% | 25,28% | 32,36% | 30,38% | 6,92% |
| 1040594 | 0 | 1 | 2 | 1 | 0 | 1 | 5,06% | 25,28% | 32,36% | 30,38% | 6,92% |
| 1070684 | 0 | 1 | 2 | 1 | 0 | 1 | 5,06% | 25,28% | 32,36% | 30,38% | 6,92% |
| 1000304 | 0 | 1 | 2 | 1 | 0 | 1 | 5,06% | 25,28% | 32,36% | 30,38% | 6,92% |
| 1000814 | 0 | 1 | 2 | 1 | 0 | 1 | 5,06% | 25,28% | 32,36% | 30,38% | 6,92% |
| 1056098 | 0 | 1 | 2 | 1 | 0 | 1 | 5,06% | 25,28% | 32,36% | 30,38% | 6,92% |
| 1080578 | 1 | 2 | 2 | 1 | 0 | 2 | 4,90% | 24,75% | 32,28% | 30,93% | 7,13% |
| 1070378 | 1 | 2 | 2 | 1 | 0 | 2 | 4,90% | 24,75% | 32,28% | 30,93% | 7,13% |
| 1051406 | 0 | 4 | 2 | 1 | 1 | 2 | 4,80% | 24,38% | 32,22% | 31,32% | 7,28% |
| 1063544 | 0 | 3 | 2 | 1 | 0 | 0 | 4,76% | 24,24% | 32,19% | 31,47% | 7,34% |
| 1045184 | 0 | 3 | 0 | 1 | 1 | 0 | 4,76% | 24,24% | 32,19% | 31,47% | 7,35% |
| 1067930 | 1 | 0 | 1 | 1 | 0 | 2 | 4,72% | 24,12% | 32,17% | 31,60% | 7,40% |
| 1063850 | 0 | 1 | 1 | 1 | 0 | 0 | 4,58% | 23,61% | 32,05% | 32,14% | 7,62% |
| 1045082 | 0 | 1 | 1 | 1 | 0 | 0 | 4,58% | 23,61% | 32,05% | 32,14% | 7,62% |
| 1004180 | 0 | 1 | 1 | 1 | 0 | 0 | 4,58% | 23,61% | 32,05% | 32,14% | 7,62% |
| 1064564 | 0 | 1 | 1 | 1 | 0 | 0 | 4,58% | 23,61% | 32,05% | 32,14% | 7,62% |
| 1064768 | 0 | 1 | 1 | 1 | 0 | 0 | 4,58% | 23,61% | 32,05% | 32,14% | 7,62% |
| 1062932 | 0 | 0 | 2 | 1 | 0 | 2 | 4,45% | 23,13% | 31,94% | 32,65% | 7,83% |
| 1085372 | 0 | 0 | 2 | 1 | 0 | 2 | 4,45% | 23,13% | 31,94% | 32,65% | 7,83% |
| 1080986 | 0 | 0 | 2 | 1 | 0 | 2 | 4,45% | 23,13% | 31,94% | 32,65% | 7,83% |
| 1039778 | 0 | 0 | 2 | 1 | 0 | 2 | 4,45% | 23,13% | 31,94% | 32,65% | 7,83% |
| 1037840 | 0 | 0 | 2 | 1 | 0 | 2 | 4,45% | 23,13% | 31,94% | 32,65% | 7,83% |
| 1050488 | 0 | 0 | 2 | 1 | 0 | 2 | 4,45% | 23,13% | 31,94% | 32,65% | 7,83% |
| 1049264 | 1 | 0 | 0 | 1 | 0 | 1 | 4,28% | 22,49% | 31,75% | 33,34% | 8,14% |
| 1086494 | 0 | 2 | 2 | 1 | 0 | 1 | 4,19% | 22,14% | 31,65% | 33,72% | 8,31% |
| 1000100 | 0 | 2 | 2 | 1 | 0 | 1 | 4,19% | 22,14% | 31,65% | 33,72% | 8,31% |
| 1056812 | 0 | 2 | 2 | 1 | 0 | 1 | 4,19% | 22,14% | 31,65% | 33,72% | 8,31% |
| 1043042 | 0 | 2 | 2 | 1 | 0 | 1 | 4,19% | 22,14% | 31,65% | 33,72% | 8,31% |

|         |   |   |   |   |   |   |       |        |        |        |        |
|---------|---|---|---|---|---|---|-------|--------|--------|--------|--------|
| 1080068 | 0 | 2 | 2 | 1 | 0 | 1 | 4,19% | 22,14% | 31,65% | 33,72% | 8,31%  |
| 1051814 | 0 | 2 | 2 | 1 | 0 | 1 | 4,19% | 22,14% | 31,65% | 33,72% | 8,31%  |
| 1089452 | 0 | 2 | 2 | 1 | 0 | 1 | 4,19% | 22,14% | 31,65% | 33,72% | 8,31%  |
| 1004792 | 0 | 2 | 2 | 1 | 0 | 1 | 4,19% | 22,14% | 31,65% | 33,72% | 8,31%  |
| 1040390 | 0 | 2 | 2 | 1 | 0 | 1 | 4,19% | 22,14% | 31,65% | 33,72% | 8,31%  |
| 1004894 | 1 | 3 | 2 | 1 | 0 | 2 | 4,06% | 21,65% | 31,48% | 34,26% | 8,55%  |
| 1070888 | 0 | 0 | 1 | 1 | 0 | 1 | 4,03% | 21,54% | 31,44% | 34,38% | 8,61%  |
| 1046000 | 0 | 0 | 1 | 1 | 0 | 1 | 4,03% | 21,54% | 31,44% | 34,38% | 8,61%  |
| 1029476 | 0 | 0 | 1 | 1 | 0 | 1 | 4,03% | 21,54% | 31,44% | 34,38% | 8,61%  |
| 1064462 | 0 | 0 | 1 | 1 | 0 | 1 | 4,03% | 21,54% | 31,44% | 34,38% | 8,61%  |
| 1029986 | 0 | 0 | 1 | 1 | 0 | 1 | 4,03% | 21,54% | 31,44% | 34,38% | 8,61%  |
| 1004996 | 0 | 0 | 1 | 1 | 0 | 1 | 4,03% | 21,54% | 31,44% | 34,38% | 8,61%  |
| 1072418 | 0 | 0 | 1 | 1 | 0 | 1 | 4,03% | 21,54% | 31,44% | 34,38% | 8,61%  |
| 1055996 | 0 | 0 | 1 | 1 | 0 | 1 | 4,03% | 21,54% | 31,44% | 34,38% | 8,61%  |
| 1086392 | 0 | 0 | 1 | 1 | 0 | 1 | 4,03% | 21,54% | 31,44% | 34,38% | 8,61%  |
| 1061402 | 0 | 4 | 2 | 1 | 0 | 0 | 3,94% | 21,17% | 31,30% | 34,78% | 8,80%  |
| 1085882 | 0 | 4 | 0 | 1 | 1 | 0 | 3,94% | 21,16% | 31,30% | 34,79% | 8,81%  |
| 1074050 | 1 | 1 | 1 | 1 | 0 | 2 | 3,91% | 21,05% | 31,26% | 34,91% | 8,87%  |
| 1001222 | 1 | 1 | 1 | 1 | 0 | 2 | 3,91% | 21,05% | 31,26% | 34,91% | 8,87%  |
| 1003160 | 1 | 1 | 1 | 1 | 0 | 2 | 3,91% | 21,05% | 31,26% | 34,91% | 8,87%  |
| 1029884 | 1 | 1 | 1 | 1 | 0 | 2 | 3,91% | 21,05% | 31,26% | 34,91% | 8,87%  |
| 1064870 | 1 | 1 | 1 | 1 | 0 | 2 | 3,91% | 21,05% | 31,26% | 34,91% | 8,87%  |
| 1085168 | 1 | 1 | 1 | 1 | 0 | 2 | 3,91% | 21,05% | 31,26% | 34,91% | 8,87%  |
| 1031720 | 0 | 1 | 2 | 1 | 0 | 2 | 3,68% | 20,14% | 30,87% | 35,93% | 9,38%  |
| 1064054 | 0 | 1 | 2 | 1 | 0 | 2 | 3,68% | 20,14% | 30,87% | 35,93% | 9,38%  |
| 1086596 | 0 | 1 | 2 | 1 | 0 | 2 | 3,68% | 20,14% | 30,87% | 35,93% | 9,38%  |
| 1087514 | 0 | 1 | 2 | 1 | 0 | 2 | 3,68% | 20,14% | 30,87% | 35,93% | 9,38%  |
| 1062014 | 1 | 3 | 1 | 1 | 0 | 1 | 3,68% | 20,11% | 30,86% | 35,96% | 9,40%  |
| 1087106 | 1 | 3 | 1 | 1 | 0 | 1 | 3,68% | 20,11% | 30,86% | 35,96% | 9,40%  |
| 1080272 | 1 | 3 | 1 | 1 | 0 | 1 | 3,68% | 20,11% | 30,86% | 35,96% | 9,40%  |
| 1059668 | 1 | 3 | 1 | 1 | 0 | 1 | 3,68% | 20,11% | 30,86% | 35,96% | 9,40%  |
| 1073030 | 0 | 0 | 0 | 1 | 0 | 0 | 3,65% | 20,00% | 30,81% | 36,08% | 9,46%  |
| 1083026 | 0 | 0 | 0 | 1 | 0 | 0 | 3,65% | 20,00% | 30,81% | 36,08% | 9,46%  |
| 1051712 | 1 | 1 | 0 | 1 | 0 | 1 | 3,54% | 19,54% | 30,58% | 36,60% | 9,74%  |
| 1043450 | 0 | 3 | 2 | 1 | 0 | 1 | 3,46% | 19,22% | 30,42% | 36,96% | 9,94%  |
| 1080374 | 0 | 3 | 2 | 1 | 0 | 1 | 3,46% | 19,22% | 30,42% | 36,96% | 9,94%  |
| 1079558 | 0 | 3 | 2 | 1 | 0 | 1 | 3,46% | 19,22% | 30,42% | 36,96% | 9,94%  |
| 1061810 | 1 | 4 | 2 | 1 | 0 | 2 | 3,36% | 18,76% | 30,18% | 37,47% | 10,23% |
| 1072010 | 0 | 1 | 1 | 1 | 0 | 1 | 3,33% | 18,66% | 30,12% | 37,59% | 10,30% |
| 1003874 | 0 | 1 | 1 | 1 | 0 | 1 | 3,33% | 18,66% | 30,12% | 37,59% | 10,30% |
| 1038962 | 0 | 1 | 1 | 1 | 0 | 1 | 3,33% | 18,66% | 30,12% | 37,59% | 10,30% |
| 1002548 | 0 | 1 | 1 | 1 | 0 | 1 | 3,33% | 18,66% | 30,12% | 37,59% | 10,30% |
| 1038146 | 1 | 3 | 0 | 1 | 0 | 0 | 3,33% | 18,64% | 30,11% | 37,61% | 10,31% |

|         |   |   |   |   |   |   |       |        |        |        |        |
|---------|---|---|---|---|---|---|-------|--------|--------|--------|--------|
| 1003262 | 0 | 3 | 1 | 1 | 0 | 0 | 3,13% | 17,79% | 29,60% | 38,58% | 10,90% |
| 1068134 | 0 | 3 | 1 | 1 | 0 | 0 | 3,13% | 17,79% | 29,60% | 38,58% | 10,90% |
| 1085576 | 1 | 0 | 0 | 1 | 0 | 2 | 3,11% | 17,68% | 29,54% | 38,69% | 10,98% |
| 1056914 | 1 | 0 | 0 | 1 | 0 | 2 | 3,11% | 17,68% | 29,54% | 38,69% | 10,98% |
| 1030292 | 0 | 2 | 2 | 1 | 0 | 2 | 3,04% | 17,38% | 29,34% | 39,04% | 11,20% |
| 1043246 | 0 | 2 | 2 | 1 | 0 | 2 | 3,04% | 17,38% | 29,34% | 39,04% | 11,20% |
| 1062728 | 0 | 1 | 0 | 1 | 0 | 0 | 3,02% | 17,26% | 29,26% | 39,17% | 11,29% |
| 1067828 | 0 | 0 | 1 | 1 | 0 | 2 | 2,93% | 16,86% | 28,99% | 39,62% | 11,60% |
| 1085066 | 0 | 0 | 1 | 1 | 0 | 2 | 2,93% | 16,86% | 28,99% | 39,62% | 11,60% |
| 1087616 | 0 | 0 | 1 | 1 | 0 | 2 | 2,93% | 16,86% | 28,99% | 39,62% | 11,60% |
| 1064972 | 0 | 0 | 1 | 1 | 0 | 2 | 2,93% | 16,86% | 28,99% | 39,62% | 11,60% |
| 1043654 | 0 | 4 | 2 | 1 | 0 | 1 | 2,86% | 16,54% | 28,76% | 39,98% | 11,85% |
| 1057730 | 0 | 4 | 2 | 1 | 0 | 1 | 2,86% | 16,54% | 28,76% | 39,98% | 11,85% |
| 1067318 | 0 | 2 | 1 | 1 | 0 | 1 | 2,75% | 16,04% | 28,39% | 40,55% | 12,27% |
| 1039472 | 0 | 2 | 1 | 1 | 0 | 1 | 2,75% | 16,04% | 28,39% | 40,55% | 12,27% |
| 1057322 | 0 | 2 | 1 | 1 | 0 | 1 | 2,75% | 16,04% | 28,39% | 40,55% | 12,27% |
| 1057526 | 0 | 2 | 1 | 1 | 0 | 1 | 2,75% | 16,04% | 28,39% | 40,55% | 12,27% |
| 1044674 | 0 | 2 | 1 | 1 | 0 | 1 | 2,75% | 16,04% | 28,39% | 40,55% | 12,27% |
| 1039370 | 0 | 2 | 1 | 1 | 0 | 1 | 2,75% | 16,04% | 28,39% | 40,55% | 12,27% |
| 1060484 | 0 | 2 | 1 | 1 | 0 | 1 | 2,75% | 16,04% | 28,39% | 40,55% | 12,27% |
| 1087412 | 1 | 3 | 1 | 1 | 0 | 2 | 2,67% | 15,64% | 28,08% | 41,00% | 12,62% |
| 1038248 | 1 | 3 | 1 | 1 | 0 | 2 | 2,67% | 15,64% | 28,08% | 41,00% | 12,62% |
| 1060076 | 1 | 3 | 1 | 1 | 0 | 2 | 2,67% | 15,64% | 28,08% | 41,00% | 12,62% |
| 1038452 | 1 | 1 | 0 | 1 | 0 | 2 | 2,57% | 15,16% | 27,68% | 41,53% | 13,06% |
| 1040696 | 1 | 1 | 0 | 1 | 0 | 2 | 2,57% | 15,16% | 27,68% | 41,53% | 13,06% |
| 1064258 | 0 | 3 | 2 | 1 | 0 | 2 | 2,51% | 14,89% | 27,45% | 41,83% | 13,32% |
| 1038554 | 0 | 3 | 2 | 1 | 0 | 2 | 2,51% | 14,89% | 27,45% | 41,83% | 13,32% |
| 1045694 | 0 | 1 | 1 | 1 | 0 | 2 | 2,42% | 14,42% | 27,03% | 42,35% | 13,78% |
| 1002650 | 0 | 1 | 1 | 1 | 0 | 2 | 2,42% | 14,42% | 27,03% | 42,35% | 13,78% |
| 1068032 | 0 | 1 | 1 | 1 | 0 | 2 | 2,42% | 14,42% | 27,03% | 42,35% | 13,78% |
| 1038350 | 0 | 1 | 1 | 1 | 0 | 2 | 2,42% | 14,42% | 27,03% | 42,35% | 13,78% |
| 1063340 | 1 | 3 | 0 | 1 | 0 | 1 | 2,41% | 14,40% | 27,01% | 42,37% | 13,80% |
| 1038860 | 0 | 1 | 0 | 1 | 0 | 1 | 2,18% | 13,26% | 25,90% | 43,60% | 15,06% |
| 1029680 | 1 | 2 | 0 | 1 | 0 | 2 | 2,12% | 12,91% | 25,54% | 43,96% | 15,47% |
| 1030088 | 0 | 4 | 2 | 1 | 0 | 2 | 2,07% | 12,67% | 25,29% | 44,20% | 15,77% |
| 1039982 | 0 | 4 | 2 | 1 | 0 | 2 | 2,07% | 12,67% | 25,29% | 44,20% | 15,77% |
| 1072520 | 0 | 2 | 1 | 1 | 0 | 2 | 1,99% | 12,26% | 24,83% | 44,62% | 16,30% |
| 1073948 | 0 | 0 | 0 | 1 | 0 | 2 | 1,92% | 11,86% | 24,37% | 45,01% | 16,85% |
| 1073744 | 0 | 4 | 1 | 1 | 0 | 1 | 1,87% | 11,62% | 24,08% | 45,24% | 17,19% |
| 1079048 | 0 | 3 | 1 | 1 | 0 | 2 | 1,64% | 10,36% | 22,49% | 46,33% | 19,18% |
| 1067216 | 0 | 3 | 0 | 1 | 0 | 1 | 1,48% | 9,47%  | 21,24% | 46,97% | 20,83% |
| 1057118 | 0 | 4 | 0 | 1 | 0 | 1 | 1,22% | 7,95%  | 18,88% | 47,68% | 24,27% |
| 1084862 | 0 | 4 | 0 | 1 | 0 | 1 | 1,22% | 7,95%  | 18,88% | 47,68% | 24,27% |

|         |   |   |   |   |   |   |       |       |        |        |        |
|---------|---|---|---|---|---|---|-------|-------|--------|--------|--------|
| 1044266 | 0 | 3 | 0 | 1 | 0 | 2 | 1,07% | 7,05% | 17,31% | 47,76% | 26,81% |
| 1044062 | 0 | 3 | 0 | 1 | 0 | 2 | 1,07% | 7,05% | 17,31% | 47,76% | 26,81% |
| 1057832 | 0 | 4 | 0 | 1 | 0 | 2 | 0,88% | 5,88% | 15,11% | 47,27% | 30,86% |
